# Supplementary material for: Cell-scale biophysical determinants of cell competition in epithelia
Source: eLife. 2021 May 20;10:e61011. doi: 10.7554/eLife.61011 (PMC8137148; doi:10.7554/eLife.61011)
Supplement: Supplementary file 1. — Parameters for the Potts model are shaded in grey. Initial conditions and computational implementation parameters are in white. Cell automaton parameters are in pink. Probability of apoptosis is implemented by a function of the form papo(ρ)=papomax(1+e−α(ρ−ρ1/2)). A.u.: arbitrary units. [file elife-61011-supp1.xlsx]

## Sheet: Sheet1
Parameter (Unit)	Winners	Losers
Initial AT at birth (pixels)	1800 competition	1800 competition
	1800 pure population	7000 pure population
ΔAtot (area added at each cell cycle, pixels)	1800	1800/7000
λ Stiffness (Joules/Pixels2)	1	0.7
JHomotypic (Joules/pixel)	8	8
JHeterotypic (Joules/pixel)	9	9
Jcell-substrate (Joules/pixel)	10	10
Average initial cell area at seeding (pixels)	1800	1800
Standard deviation of initial cell target area σ (pixels)	500	500
G – Growth rate (pixels per frame)	6	4
Sensitivity to contact inhibition k (a.u.)	0.01	0.01
Papo_max (cell-1.frame-1)	2.5 x 10-3	2.5 x 10-3
α (a.u.)	-235.8	-509.4
ρ1/2 (µm-2)	0.0152	0.0067
