# Supplementary material for: Cell-scale biophysical determinants of cell competition in epithelia
Source: eLife. 2021 May 20;10:e61011. doi: 10.7554/eLife.61011 (PMC8137148; doi:10.7554/eLife.61011)
Supplement: Supplementary file 2. — Parameters for the Potts model are shaded in grey. Initial conditions and computational implementation parameters are in white. Cell automaton parameters are in pink. Parameters that were varied are indicated, and the range is given in brackets. Probability of apoptosis is implemented by a function of the form papo(ρ)=papomax(1+e−α(ρ−ρ1/2)). A.u.: arbitrary units. [file elife-61011-supp2.xlsx]

## Sheet: Sheet1
Parameter (Unit)	Winners	Losers
Initial AT at birth (pixels)	1800	1800
ΔAtot (area added at each cell cycle, pixels)	1800	1800
λ Stiffness (Joules/Pixels2)	1	Variable (0.1-2.0) or 0.9
JHomotypic (Joules/pixel)	8	8
JHeterotypic (Joules/pixel)	9	Variable (4-12) or 9
Jcell-substrate (Joules/pixel)	10	10
Average initial cell area at seeding (pixels)	1800	1800
Standard deviation of initial cell area σ (pixels)	500	500
G – Growth rate (pixels per frame)	6	Variable (1.0-8.0) or 3.5
Sensitivity to contact inhibition k (a.u.)	Variable (10-4-1.0)	0.01
Papo_max (cell-1.frame-1)	2.5 x 10-3	2.5 x 10-3
α (a.u.)	-235.8	-509.4
ρ1/2 (µm-2)	0.0152	0.0067
