# Supplementary material for: Cell-scale biophysical determinants of cell competition in epithelia
Source: eLife. 2021 May 20;10:e61011. doi: 10.7554/eLife.61011 (PMC8137148; doi:10.7554/eLife.61011)
Supplement: Supplementary file 4. — See Supplementary files 1 and 2 for exact values. [file elife-61011-supp4.xlsx]

## Sheet: Sheet1
Parameter varied	Values	Outcome of competition	Parameter Status		Fixed Parameters	Parameter Status (Known or Calibrated)
		(Elimination/coexistence)	(Calibrated or measured directly)		Initial AT at birth (pixels)	Known
Loser cell Stiffness (λ)	0.1	Elimination	Calibrated		papo_max (cell-1.frame-1)	Known
	0.3	Elimination			ρ1/2 (µm-2)	Known
	0.5	Elimination			α (a.u.)	Known
	1.0 (Winner Value)	Co-existence			Average initial cell area at seeding (pixels)	Known
	2	Co-existence			Standard deviation of initial cell area σ (pixels)	Known
Winner Cell Contact inhibition k (affecting ΔHD)	0.0001	Elimination	Calibrated		JHomotypic (Joules/pixel)	Calibrated
	0.001	Elimination			Jcell-substrate (Joules/pixel)	Calibrated
	0.01	Elimination
	0.1 (Loser Value)	Co-existence
	1	Co-existence
Heterotypic adhesion (Jheterotypic)	1	Elimination	Calibrated
	5	Elimination
	9	Elimination
	14	Elimination
	20	Elimination
Loser cell Growth rate (G)	1	Elimination	Known
	3	Elimination
	5 (Winner Value=6)	Elimination
	8	Elimination
Initial configuration	Fully Mixed	Elimination	N.A.
	Partially Sorted	Elimination
	Fully Sorted	Elimination
