# Supplementary material for: Cell-scale biophysical determinants of cell competition in epithelia
Source: eLife. 2021 May 20;10:e61011. doi: 10.7554/eLife.61011 (PMC8137148; doi:10.7554/eLife.61011)
Supplement: Supplementary file 5. — See Supplementary file 3 for exact values. Note that all density-related parameters are fixed because apoptosis does not depend on density. [file elife-61011-supp5.xlsx]

## Sheet: Sheet1
Parameter varied	Values	Outcome of competition after 200h	Parameter Status			Fixed Parameters	Parameter Status (Known or Calibrated)
		(Elimination/coexistence)	(Calibrated or measured directly)			Initial AT at birth (pixels)	Known
Heterotypic adhesion (Jheterotypic) - Fully mixed configuration	1	Elimination	Calibrated			ΔAtot (area added at each cell cycle, pixels)	Known
	5	Elimination				λ Stiffness (Joules/Pixels2)	Calibrated
	9	Elimination				JHomotypic (Joules/pixel)	Calibrated
	14	Elimination				JHeterotypic (Joules/pixel)	Calibrated
	20	Elimination				Jsubstrate (Joules/pixel)	Calibrated
Heterotypic adhesion (Jheterotypic) - Partially sorted configuration	1	Elimination	Calibrated			Average initial cell area at seeding (pixels)	Known
	5	Elimination				Standard deviation of initial cell area σ (pixels)	Known
	9	Co-existence				G – Growth rate (pixels per frame)	Calibrated
	14	Co-existence				Sensitivity to contact inhibition k (a.u.)	Calibrated
	20	Co-existence				Papo_max (cell-1.frame-1)	Calibrated
Heterotypic adhesion (Jheterotypic) - Fully sorted configuration	1	Co-existence	Calibrated			n	Calibrated
	5	Co-existence
	9	Co-existence
	14	Co-existence
	20	Co-existence
Initial configuration	Fully Mixed	Elimination	NA
	Partially Sorted	Elimination
	Fully Sorted	Co-existence
Sensitivity to heterotypic contact (S)	0.1	Elimination	Calibrated
	0.3	Elimination
	0.5 (Winner Value)	Elimination
	0.7	Co-existence
	0.9	Co-existence
